# Supplementary material for: Chromosome 5p Region SNPs Are Associated with Risk of NSCLC among Women
Source: Hindawi journal article supplement (doi:10.1155/2009/242151), 2009-01-01
Supplement: f1 [file 242151.f1.pdf]

Supplemental Table 1: Associations between Chromosome 5p SNPs and Risk of NSCLC by Race under Recessive, Genotypic, and Log Additive Models

| Gene   | SNP Identifier | Caucasians                     |                              |                                    |                                   | African Americans              |                              |                                    |                                   |
|--------|----------------|--------------------------------|------------------------------|------------------------------------|-----------------------------------|--------------------------------|------------------------------|------------------------------------|-----------------------------------|
|        |                | Recessive Model<br>OR (95% CI) | Heterozygotes<br>OR (95% CI) | Homozygous Variants<br>OR (95% CI) | Log Additive Model<br>OR (95% CI) | Recessive Model<br>OR (95% CI) | Heterozygotes<br>OR (95% CI) | Homozygous Variants<br>OR (95% CI) | Log Additive Model<br>OR (95% CI) |
| AHRR   | rs34847072     | 1.10 (0.65-1.84)               | 0.90 (0.61-1.34)             | 1.04 (0.60-1.81)                   | 0.99 (0.76-1.29)                  |                                | 1.17 (0.47-2.88)             |                                    | 0.91 (0.41-2.02)                  |
| AHRR   | rs10078        | 0.89 (0.35-2.25)               | 0.84 (0.57-1.23)             | 0.83 (0.32-2.13)                   | 0.87 (0.63-1.19)                  | 1.11 (0.23-5.34)               | 0.62 (0.30-1.29)             | 0.92 (0.19-4.58)                   | 0.75 (0.42-1.35)                  |
| TERT   | rs2853690      | 0.68 (0.26-1.77)               | 0.96 (0.64-1.45)             | 0.68 (0.26-1.76)                   | 0.90 (0.65-1.25)                  | 1.01 (0.34-2.97)               | 0.78 (0.38-1.63)             | 0.90 (0.29-2.79)                   | 0.89 (0.54-1.48)                  |
| TERT   | rs2075786      | 1.40 (0.82-2.38)               | 1.09 (0.74-1.62)             | 1.46 (0.83-2.57)                   | 1.18 (0.90-1.53)                  | 1.73 (0.80-3.74)               | <b>2.78 (1.10-7.02)</b>      | <b>3.54 (1.27-9.85)</b>            | <b>1.82 (1.10-3.02)</b>           |
| TERT   | rs2853677      | 0.93 (0.59-1.46)               | <b>1.93 (1.24-3.00)</b>      | 1.42 (0.83-2.42)                   | 1.23 (0.94-1.60)                  | 1.93 (0.54-6.88)               | <b>2.09 (1.01-4.35)</b>      | 2.68 (0.71-10.07)                  | <b>1.82 (1.05-3.17)</b>           |
| TERT   | rs2735940      | <b>0.60 (0.38-0.94)</b>        | 1.18 (0.77-1.81)             | 0.66 (0.39-1.12)                   | 0.84 (0.64-1.08)                  | 0.71 (0.33-1.51)               | <b>0.38 (0.16-0.91)</b>      | <b>0.38 (0.15-0.99)</b>            | 0.63 (0.39-1.00)                  |
| TERT   | rs1801075      | 2.28 (0.74-6.97)               | 0.92 (0.61-1.39)             | 2.23 (0.72-6.87)                   | 1.08 (0.77-1.53)                  | 1.05 (0.10-10.87)              | 1.12 (0.53-2.34)             | 1.08 (0.10-11.30)                  | 1.10 (0.57-2.10)                  |
| SLC6A3 | rs6347         | 0.93 (0.45-1.94)               | 1.12 (0.76-1.64)             | 0.98 (0.46-2.08)                   | 1.05 (0.78-1.41)                  | 0.77 (0.36-1.65)               | 0.72 (0.30-1.74)             | 0.61 (0.23-1.63)                   | 0.79 (0.48-1.28)                  |
| SLC6A3 | rs460700       | 0.93 (0.42-2.03)               | 0.78 (0.52-1.16)             | 0.86 (0.39-1.89)                   | 0.85 (0.63-1.15)                  | <b>0.21 (0.05-0.89)</b>        | 0.98 (0.48-2.00)             | <b>0.21 (0.05-0.92)</b>            | 0.66 (0.38-1.15)                  |
| SLC6A3 | rs2652511      | 1.12 (0.72-1.75)               | 1.34 (0.87-2.06)             | 1.33 (0.80-2.23)                   | 1.17 (0.91-1.51)                  | 0.77 (0.38-1.53)               | 1.06 (0.37-3.04)             | 0.80 (0.27-2.31)                   | 0.86 (0.52-1.40)                  |
| MTRR   | rs10380        | 0.29 (0.06-1.46)               | 1.03 (0.64-1.66)             | 0.29 (0.06-1.47)                   | 0.87 (0.57-1.32)                  | 0.60 (0.18-1.95)               | 1.17 (0.57-2.42)             | 0.65 (0.19-2.23)                   | 0.93 (0.55-1.58)                  |
| MTRR   | rs1802059      | 1.19 (0.69-2.05)               | 0.84 (0.56-1.24)             | 1.08 (0.60-1.93)                   | 0.98 (0.74-1.28)                  | 0.81 (0.24-2.74)               | 1.07 (0.52-2.21)             | 0.83 (0.24-2.91)                   | 0.97 (0.57-1.64)                  |
| MTRR   | rs9332         | 0.27 (0.06-1.35)               | 1.11 (0.70-1.74)             | 0.28 (0.06-1.38)                   | 0.92 (0.62-1.37)                  | 0.82 (0.31-2.17)               | 1.07 (0.51-2.24)             | 0.85 (0.30-2.43)                   | 0.95 (0.58-1.56)                  |
| MTRR   | rs8659         | 0.80 (0.46-1.37)               | 1.10 (0.75-1.64)             | 0.84 (0.47-1.50)                   | 0.96 (0.74-1.26)                  | 1.35 (0.60-3.06)               | 0.81 (0.34-1.91)             | 1.16 (0.42-3.22)                   | 1.08 (0.64-1.80)                  |
| AMACR  | rs2278008      | 0.90 (0.42-1.92)               | 1.17 (0.80-1.70)             | 0.96 (0.44-2.09)                   | 1.07 (0.80-1.44)                  | 0.19 (0.03-1.13)               | 1.27 (0.59-2.73)             | 0.20 (0.03-1.25)                   | 0.79 (0.44-1.43)                  |
| AMACR  | rs840409       | 1.14 (0.28-4.63)               | 1.02 (0.65-1.60)             | 1.15 (0.28-4.67)                   | 1.03 (0.70-1.53)                  | 4.22 (0.15-119.87)             | 0.53 (0.20-1.40)             | 3.66 (0.13-105.11)                 | 0.70 (0.29-1.67)                  |
| AMACR  | rs34677        | 1.69 (0.57-5.01)               | 0.93 (0.61-1.42)             | 1.66 (0.56-4.94)                   | 1.04 (0.73-1.48)                  | 4.24 (0.15-122.12)             | 0.82 (0.35-1.95)             | 4.04 (0.14-116.54)                 | 0.97 (0.44-2.13)                  |
| AMACR  | rs2287939      | 0.99 (0.72-1.75)               | 1.20 (0.82-1.75)             | 1.08 (0.53-2.20)                   | 1.11 (0.83-1.48)                  | 0.39 (0.03-5.42)               | 0.70 (0.32-1.53)             | 0.35 (0.02-4.92)                   | 0.67 (0.33-1.35)                  |
| AMACR  | rs10941112     | 1.26 (0.82-1.94)               | 1.13 (0.73-1.76)             | 1.36 (0.82-2.26)                   | 1.16 (0.90-1.50)                  | 0.99 (0.44-2.25)               | 1.63 (0.17-15.34)            | 1.52 (0.18-13.01)                  | 1.04 (0.52-2.10)                  |
| AMACR  | rs34689        | 1.33 (0.49-3.64)               | 1.00 (0.67-1.49)             | 1.33 (0.48-3.67)                   | 1.06 (0.76-1.47)                  | 1.50 (0.64-3.49)               | 0.46 (0.20-1.07)             | 0.93 (0.34-2.51)                   | 0.92 (0.56-1.50)                  |
| GHR    | rs2972395      | 0.68 (0.25-1.84)               | 0.90 (0.61-1.35)             | 0.66 (0.24-1.80)                   | 0.87 (0.62-1.21)                  | <b>0.09 (0.01-0.92)</b>        | 1.33 (0.61-2.88)             | 0.10 (0.01-1.02)                   | 0.77 (0.42-1.43)                  |
| GHR    | rs2940930      | 1.40 (0.81-2.42)               | 0.69 (0.46-1.02)             | 1.13 (0.63-2.05)                   | 0.94 (0.72-1.24)                  | 1.27 (0.16-10.35)              | 1.74 (0.83-3.64)             | 1.52 (0.18-12.66)                  | 1.57 (0.82-2.98)                  |
| GHR    | rs7732059      | 1.50 (0.65-3.47)               | 1.25 (0.85-1.84)             | 1.64 (0.70-3.85)                   | 1.26 (0.92-1.73)                  | 0.85 (0.27-2.71)               | 1.38 (0.67-2.86)             | 0.99 (0.30-3.34)                   | 1.13 (0.67-1.90)                  |
| GHR    | rs1858136      | 0.70 (0.25-1.91)               | 0.89 (0.60-1.32)             | 0.67 (0.24-1.86)                   | 0.86 (0.62-1.20)                  | 0.72 (0.17-3.06)               | 0.70 (0.33-1.49)             | 0.64 (0.15-2.81)                   | 0.75 (0.42-1.32)                  |
| GHR    | rs2972418      | 1.02 (0.66-1.59)               | 1.13 (0.72-1.76)             | 1.11 (0.65-1.90)                   | 1.06 (0.81-1.38)                  | 0.89 (0.44-1.81)               | 0.67 (0.22-2.05)             | 0.65 (0.21-2.03)                   | 0.85 (0.50-1.43)                  |
| GHR    | rs2972419      | 0.69 (0.26-1.84)               | 0.96 (0.65-1.43)             | 0.68 (0.26-1.83)                   | 0.91 (0.66-1.26)                  | 0.12 (0.01-1.26)               | 1.19 (0.56-2.53)             | 0.13 (0.01-1.35)                   | 0.80 (0.42-1.50)                  |
| GHR    | rs2940944      | 1.02 (0.65-1.60)               | 1.28 (0.83-1.97)             | 1.20 (0.71-2.05)                   | 1.11 (0.85-1.44)                  | 0.61 (0.28-1.32)               | 1.41 (0.56-3.57)             | 0.78 (0.28-2.16)                   | 0.84 (0.51-1.39)                  |
| GHR    | rs2972392      | 1.06 (0.65-1.73)               | 1.31 (0.86-1.98)             | 1.26 (0.73-2.19)                   | 1.15 (0.88-1.50)                  | 0.61 (0.28-1.31)               | 1.32 (0.53-3.30)             | 0.74 (0.27-2.02)                   | 0.83 (0.50-1.36)                  |
| GHR    | rs33939197     | 1.42 (0.48-4.16)               | 1.27 (0.86-1.86)             | 1.55 (0.52-4.58)                   | 1.26 (0.90-1.75)                  | 0.13 (0.01-2.01)               | 0.99 (0.44-2.23)             | 0.13 (0.01-2.04)                   | 0.75 (0.37-1.51)                  |
| GHR    | rs2940913      | 1.05 (0.67-1.64)               | 1.26 (0.82-1.95)             | 1.23 (0.72-2.09)                   | 1.12 (0.86-1.45)                  | 0.96 (0.47-1.96)               | 0.59 (0.19-1.85)             | 0.62 (0.19-2.03)                   | 0.86 (0.51-1.47)                  |
| GHR    | rs7735889      | 1.77 (0.77-4.07)               | 1.04 (0.71-1.51)             | 1.80 (0.77-4.21)                   | 1.16 (0.85-1.57)                  | 0.60 (0.28-1.28)               | 0.62 (0.25-1.56)             | 0.43 (0.16-1.17)                   | 0.66 (0.40-1.08)                  |
| GHR    | rs7712701      | 2.03 (0.84-4.89)               | 1.13 (0.77-1.66)             | 2.14 (0.88-5.25)                   | 1.25 (0.91-1.72)                  | 0.95 (0.46-1.95)               | 0.80 (0.31-2.10)             | 0.81 (0.29-2.22)                   | 0.92 (0.56-1.50)                  |
| GHR    | rs28943882     | 1.61 (0.51-5.14)               | 1.13 (0.77-1.67)             | 1.68 (0.52-5.39)                   | 1.18 (0.84-1.65)                  | 0.62 (0.22-1.77)               | 1.17 (0.56-2.45)             | 0.68 (0.22-2.13)                   | 0.91 (0.54-1.53)                  |
| GHR    | rs6873545      | 1.51 (0.77-2.96)               | <b>1.48 (1.00-2.17)</b>      | 1.82 (0.90-3.68)                   | <b>1.40 (1.05-1.88)</b>           | 0.51 (0.20-1.30)               | 1.33 (0.60-2.94)             | 0.62 (0.21-1.81)                   | 0.85 (0.51-1.43)                  |
| GHR    | rs4451056      | 3.57 (0.97-13.17)              | 1.40 (0.94-2.08)             | <b>3.96 (1.06-14.77)</b>           | <b>1.53 (1.07-2.17)</b>           | 2.18 (0.13-36.78)              | 0.66 (0.31-1.41)             | 1.87 (0.11-32.16)                  | 0.76 (0.38-1.52)                  |
| GHR    | rs6878512      | 3.57 (0.97-13.17)              | 1.44 (0.97-2.15)             | <b>4.01 (1.07-14.96)</b>           | <b>1.57 (1.10-2.23)</b>           | 3.68 (0.71-18.98)              | 0.55 (0.26-1.16)             | 2.98 (0.55-16.06)                  | 0.92 (0.51-1.65)                  |
| GHR    | rs6897530      | 1.58 (0.80-3.13)               | <b>1.48 (1.01-2.18)</b>      | 1.91 (0.94-3.89)                   | <b>1.43 (1.06-1.91)</b>           | 1.10 (0.52-2.36)               | 0.94 (0.38-2.29)             | 1.05 (0.39-2.86)                   | 1.03 (0.63-1.70)                  |
| GHR    | rs6179         | 1.51 (0.76-3.02)               | 1.41 (0.96-2.07)             | 1.78 (0.87-3.66)                   | <b>1.37 (1.02-1.84)</b>           | 0.88 (0.42-1.86)               | 0.94 (0.34-2.65)             | 0.84 (0.27-2.61)                   | 0.91 (0.53-1.56)                  |
| GHR    | rs2972780      | 1.36 (0.66-2.78)               | <b>1.48 (1.01-2.16)</b>      | 1.64 (0.78-3.44)                   | <b>1.37 (1.02-1.84)</b>           | 0.78 (0.36-1.69)               | 0.83 (0.31-2.20)             | 0.67 (0.22-2.02)                   | 0.82 (0.48-1.40)                  |
| GHR    | rs6180         | 0.68 (0.43-1.10)               | 0.79 (0.51-1.22)             | 0.59 (0.34-1.02)                   | 0.77 (0.59-1.01)                  | 1.80 (0.52-6.15)               | 0.93 (0.45-1.93)             | 1.71 (0.46-6.39)                   | 1.13 (0.64-2.00)                  |
| SEPP1  | rs6413428      | 1.29 (0.61-2.74)               | <b>1.56 (1.06-2.28)</b>      | 1.58 (0.73-3.42)                   | <b>1.40 (1.04-1.89)</b>           | 2.30 (0.52-10.13)              | 0.63 (0.31-1.31)             | 1.77 (0.38-8.30)                   | 0.89 (0.49-1.61)                  |
| SEPP1  | rs7579         | 1.02 (0.52-2.02)               | 1.08 (0.74-1.59)             | 1.06 (0.53-2.13)                   | 1.05 (0.79-1.40)                  | 0.27 (0.03-2.68)               | 0.85 (0.39-1.82)             | 0.25 (0.02-2.57)                   | 0.73 (0.37-1.45)                  |
